# Supplementary material
Source: PubMed Central journal article supplement (PMC2914554)
Supplement: NIHMS218445-supplement-S1.pdf [file NIHMS218445-supplement-S1.pdf]

# PROTEOMICS

**Supporting Information  
for Proteomics**

**DOI 10.1002/pmic.200800600**

Doug W. Chan, Yi Wang, Meng Wu, Jiemin Wong, Jun Qin and Yingming Zhao

**Unbiased proteomic screen for binding proteins  
to modified lysines on histone H3**

**Supplementary Table 1.** Proteins identified to bind the beads control pull-down<sup>1</sup>

| HGNC Symbol  | GeneID | Description                                                                                       | Pep # <sup>2</sup> | xCorr <sup>3</sup> |
|--------------|--------|---------------------------------------------------------------------------------------------------|--------------------|--------------------|
| ACACA        | 31     | acetyl-Coenzyme A carboxylase alpha                                                               | 132                | 470.33             |
| CHD4         | 1108   | chromodomain helicase DNA binding protein 4                                                       | 55                 | 284.29             |
| CHD3         | 1107   | chromodomain helicase DNA binding protein 3                                                       | 29                 | 140.27             |
| MYH9         | 4627   | myosin, heavy chain 9, non-muscle                                                                 | 19                 | 100.2              |
| TCOF1        | 6949   | Treacher Collins-Franceschetti syndrome 1                                                         | 19                 | 90.22              |
| ACTC1        | 70     | actin, alpha, cardiac muscle 1                                                                    | 41                 | 88.2               |
| ACACB        | 32     | acetyl-Coenzyme A carboxylase beta                                                                | 22                 | 80.2               |
| ACTG1        | 71     | actin, gamma 1                                                                                    | 30                 | 60.27              |
| XRCC5        | 7520   | X-ray repair complementing defective repair in Chinese hamster cells 5 (Ku autoantigen, 80kDa)    | 10                 | 60.25              |
| NPM1         | 4869   | nucleophosmin (nucleolar phosphoprotein B23, numatrin)                                            | 43                 | 50.3               |
| TRIM28       | 10155  | tripartite motif-containing 28                                                                    | 21                 | 50.22              |
| GATAD2A      | 54815  | GATA zinc finger domain containing 2A                                                             | 7                  | 50.21              |
| POLR1A       | 25885  | polymerase (RNA) I polypeptide A, 194kDa                                                          | 7                  | 50.19              |
| CD3EAP       | 10849  | CD3e molecule, epsilon associated protein                                                         | 6                  | 40.24              |
| GATAD2B      | 57459  | GATA zinc finger domain containing 2B                                                             | 5                  | 40.2               |
| POLR1C       | 9533   | polymerase (RNA) I polypeptide C, 30kDa                                                           | 6                  | 40.2               |
| SPTBN1       | 6711   | spectrin, beta, non-erythrocytic 1                                                                | 4                  | 38.22              |
| BASP1        | 10409  | brain abundant, membrane attached signal protein 1                                                | 6                  | 30.32              |
| RBBP7        | 5931   | retinoblastoma binding protein 7                                                                  | 4                  | 30.23              |
| UHRF1        | 29128  | ubiquitin-like, containing PHD and RING finger domains, 1                                         | 7                  | 30.19              |
| NOLC1        | 9221   | nucleolar and coiled-body phosphoprotein 1                                                        | 3                  | 30.17              |
| SPTAN1       | 6709   | spectrin, alpha, non-erythrocytic 1 (alpha-fodrin)                                                | 3                  | 30.16              |
| MYO1C        | 4641   | myosin IC                                                                                         | 4                  | 30.15              |
| YBX1         | 4904   | Y box binding protein 1                                                                           | 4                  | 20.25              |
| RAI1         | 10743  | retinoic acid induced 1                                                                           | 2                  | 20.23              |
| CORO1C       | 23603  | coronin, actin binding protein, 1C                                                                | 2                  | 20.22              |
| TPM3         | 7170   | tropomyosin 3                                                                                     | 2                  | 20.2               |
| ACACA        | 31     | acetyl-Coenzyme A carboxylase alpha                                                               | 6                  | 20.2               |
| PAF1         | 54623  | Par1, RNA polymerase II associated factor, homolog (S. cerevisiae)                                | 5                  | 20.19              |
| CHAF1A       | 10036  | chromatin assembly factor 1, subunit A (p150)                                                     | 3                  | 20.19              |
| TUBB1        | 81027  | tubulin, beta 1                                                                                   | 2                  | 20.18              |
| EHMT2        | 10919  | euchromatic histone-lysine N-methyltransferase 2                                                  | 2                  | 20.16              |
| LMO7         | 4008   | LIM domain 7                                                                                      | 2                  | 20.16              |
| SRP68        | 6730   | signal recognition particle 68kDa                                                                 | 4                  | 20.15              |
| SFPQ         | 6421   | splicing factor proline/glutamine-rich (polypyrimidine tract binding protein associated)          | 5                  | 20.14              |
| POGZ         | 23126  | pogo transposable element with ZNF domain                                                         | 2                  | 18.23              |
| HNRNPU       | 3192   | heterogeneous nuclear ribonucleoprotein U (scaffold attachment factor A)                          | 2                  | 18.14              |
| CHAF1B       | 8208   | chromatin assembly factor 1, subunit B (p60)                                                      | 2                  | 10.28              |
| TUBB4        | 10382  | tubulin, beta 4                                                                                   | 2                  | 10.28              |
| TCOF1        | 6949   | Treacher Collins-Franceschetti syndrome 1                                                         | 2                  | 10.27              |
| HDAC2        | 3066   | histone deacetylase 2                                                                             | 1                  | 10.24              |
| DDB1         | 1642   | damage-specific DNA binding protein 1, 127kDa                                                     | 1                  | 10.24              |
| RBBP4        | 5928   | retinoblastoma binding protein 4                                                                  | 2                  | 10.23              |
| PRB1         | 5542   | proline-rich protein BstNI subfamily 1                                                            | 1                  | 10.23              |
| DDX21        | 9188   | DEAD (Asp-Glu-Ala-Asp) box polypeptide 21                                                         | 3                  | 10.22              |
| RP11-78J21.1 | 144983 | heterogeneous nuclear ribonucleoprotein A1-like                                                   | 2                  | 10.19              |
| TCEB3        | 6924   | transcription elongation factor B (SIII), polypeptide 3 (110kDa, elongin A)                       | 1                  | 10.19              |
| CSNK2A1      | 1457   | casein kinase 2, alpha 1 polypeptide                                                              | 2                  | 10.18              |
| DBN1         | 1627   | drebrin 1                                                                                         | 1                  | 10.18              |
| TCF20        | 6942   | transcription factor 20 (AR1)                                                                     | 1                  | 10.18              |
| TUBB3        | 10381  | tubulin, beta 3                                                                                   | 2                  | 10.18              |
| SET          | 6418   | SET translocation (myeloid leukemia-associated)                                                   | 6                  | 10.18              |
| SMARCC2      | 6601   | SWI/SNF related, matrix associated, actin dependent regulator of chromatin, subfamily c, member 2 | 1                  | 10.18              |
| MYO1B        | 4430   | myosin IB                                                                                         | 2                  | 10.18              |
| TWISTNB      | 221830 | TWIST neighbor                                                                                    | 1                  | 10.18              |
| TUBA3C       | 7278   | tubulin, alpha 3c                                                                                 | 1                  | 10.17              |
| DSG1         | 1828   | desmoglein 1                                                                                      | 4                  | 10.17              |
| MATR3        | 9782   | matrin 3                                                                                          | 1                  | 10.17              |
| HNRNPA1      | 3178   | heterogeneous nuclear ribonucleoprotein A1                                                        | 1                  | 10.17              |
| TUBB         | 203068 | tubulin, beta                                                                                     | 2                  | 10.16              |
| HNRPF        | 3185   | heterogeneous nuclear ribonucleoprotein F                                                         | 1                  | 10.16              |
| BAZ1B        | 9031   | bromodomain adjacent to zinc finger domain, 1B                                                    | 1                  | 10.16              |
| TARDBP       | 23435  | TAR DNA binding protein                                                                           | 1                  | 10.16              |
| TMSL3        | 7117   | thymosin-like 3                                                                                   | 3                  | 10.15              |
| KPNA1        | 3836   | karyopherin alpha 1 (importin alpha 5)                                                            | 2                  | 10.15              |
| MYO1F        | 4542   | myosin IF                                                                                         | 1                  | 10.15              |
| HEATR1       | 55127  | HEAT repeat containing 1                                                                          | 1                  | 10.15              |
| U2AF2        | 11338  | U2 small nuclear RNA auxiliary factor 2                                                           | 2                  | 10.15              |
| LOC653972    | 653972 | similar to chromobox homolog 3                                                                    | 2                  | 10.14              |
| MTA2         | 9219   | metastasis associated 1 family, member 2                                                          | 2                  | 10.14              |
| KRT75        | 9119   | keratin 75                                                                                        | 2                  | 10.14              |
| MTA3         | 57504  | metastasis associated 1 family, member 3                                                          | 1                  | 10.14              |
| RPL5         | 6125   | ribosomal protein L5                                                                              | 1                  | 10.13              |
| HNRNPR       | 10236  | heterogeneous nuclear ribonucleoprotein R                                                         | 1                  | 10.13              |
| EIF3EIP      | 51386  | eukaryotic translation initiation factor 3, subunit E interacting protein                         | 1                  | 10.13              |
| MBD5         | 55777  | methyl-CpG binding domain protein 5                                                               | 1                  | 10.12              |
| VIM          | 7431   | vimentin                                                                                          | 1                  | 10.12              |
| KPNA6        | 23633  | karyopherin alpha 6 (importin alpha 7)                                                            | 2                  | 10.12              |
| H1FOO        | 132243 | H1 histone family, member O, oocyte-specific                                                      | 1                  | 10.12              |
| MYO1E        | 4643   | myosin IE                                                                                         | 1                  | 10.12              |
| ITPR2        | 3709   | inositol 1,4,5-trisphosphate receptor, type 2                                                     | 1                  | 10.12              |
| HAT1         | 8520   | histone acetyltransferase 1                                                                       | 4                  | 10.12              |
| NRD1         | 4898   | nardilysin (N-arginine dibasic convertase)                                                        | 1                  | 10.11              |
| RPL27        | 6155   | ribosomal protein L27                                                                             | 1                  | 10.11              |

<sup>1</sup>The proteins highlighted in yellow are also listed in Table 1 because a significant increase in the number of peptides were detected in at least one of the H3 pull-downs.

<sup>2</sup>Proteins not highlighted are nonspecific binding proteins.

<sup>3</sup>The total number of peptides for the indicated protein detected in the beads control pull-down.

<sup>4</sup>Proteins are listed in decreasing xCorr score.
